# Supplementary material for: Dehydration-Induced Anorexia Reduces Astrocyte Density in the Rat Corpus Callosum
Source: Hindawi journal article supplement (doi:10.1155/2015/474917), 2015-01-01

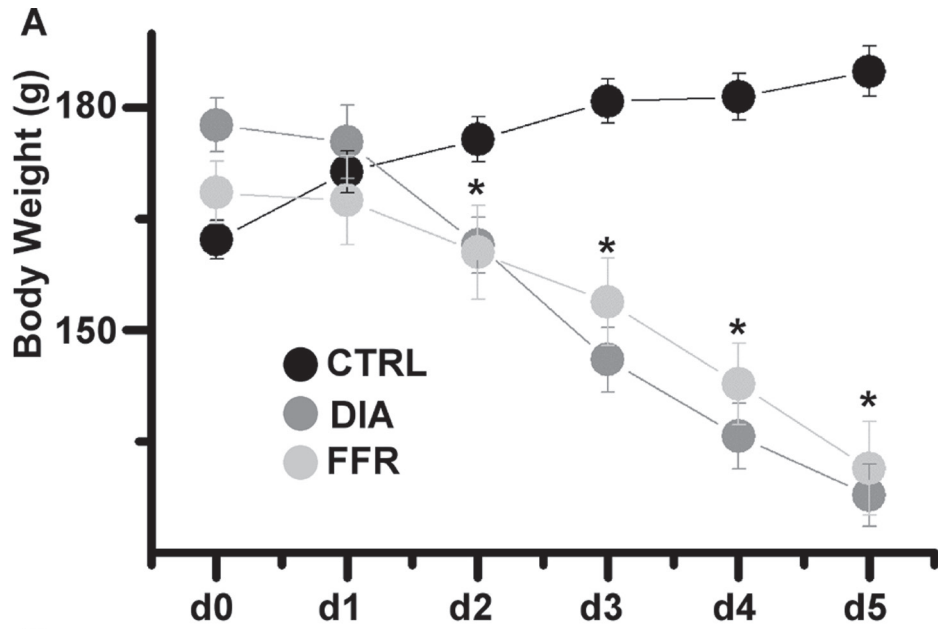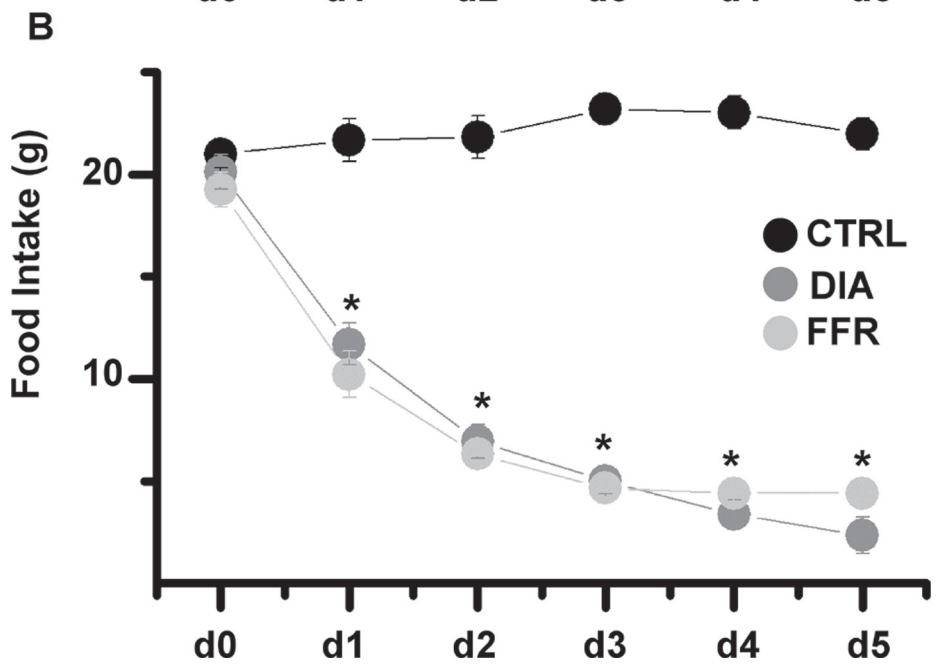

Supplement: f1 [file 474917.f1.pdf]
